# Supplementary material
Source: PubMed Central journal article supplement (PMC4663161)

# Delgado and Lim. Supplemental Figure 1

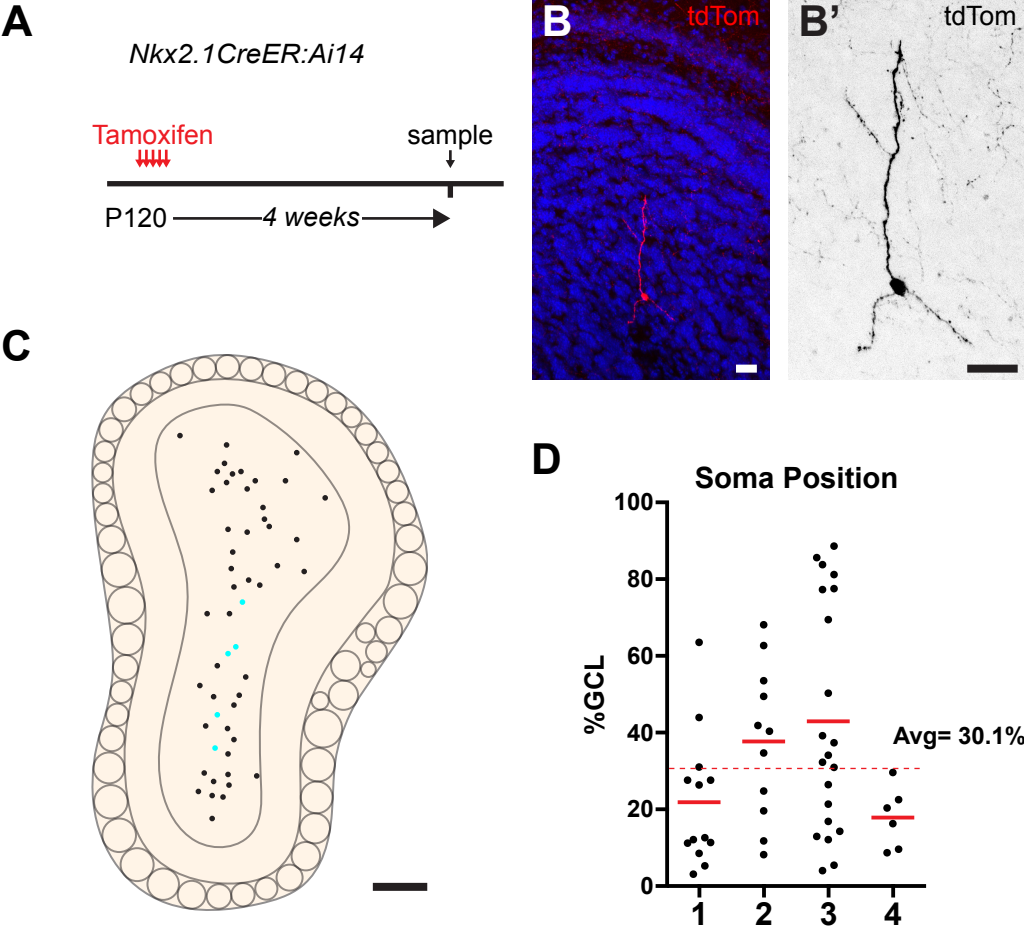

Supplement: NIHMS728505-supplement-2.pdf [file NIHMS728505-supplement-2.pdf]
